# Supplementary material for: A Systems Biology Starter Kit for Arenaviruses
Source: Viruses. 2012 Dec 11;4(12):3625–46. doi: 10.3390/v4123625 (PMC3528283; doi:10.3390/v4123625)
Supplement: Supplementary File 1 [file viruses-04-03625-s001.xlsx]

## Sheet: Sheet1
Table S1. Arenavirus Host targets Dataset
Key
Unique Identifier	Nodes are assigned a unique ID number in Cytoscape
Node label	Nodes are labelled by their protein names
Complex	If a protein complex was identified as playing a role in arenavirus infection, representative proteins of this complex were highlighted as viral targets.
Arenavirus protein	Arenavirus protein involved in viral-host protein-protein interaction, or either responsible for, or targeted in, the phenotype described in Description and References
Description and References	Details on the role of the host target protein in virus infection or as identified by expression/ co-expression of viral proteins. Numbers in brackets refer to the primary study, as listed in the manuscript.
	(v) refers to the identification of the phenotype in virus-infected cells or animal models. When a phenotype was identified using virus, but not during the course of an active infection, the technique used is indicated after the v denomination eg (v, VOPBA) (VOPBA=virus overlay protein blot assay)
	(e) refers to the identification of the phenotype through expression of the viral protein(s) of interest, but not within the context of a virus infection, eg transient transfection of cells with an expression vector for an arenavirus protein
	(ps) refers to the identification of the phenotype through the use of arenavirus GP-pseudotyped vectors.
Unique Identifier	Node label	Complex	Arenavirus protein	Description and References
95065	ALIX		Z, NP	Protein- protein interaction - MOPV Z and NP [46] (e). ALIX not required for LASV Z VLPs budding [64] (e), but required for cell entry by LCMV Cl13 (ps,v) and LASV (ps) [67]
175127	PML		Z	Protein- protein interaction - LCMV ARM, LASV Z [8] (e). Cytoplasmic redistribution of PML nuclear bodies can be observed upon LCMV infection or expression of LCMV Z [8, 11, 94] (v,e). PML levels decrease during LCMV infection [11](v).
4753	EIF4E		Z	Protein-protein interaction - LCMV ARM Z [9, 10](e), LASV Z [47] (e). EIF4E is incorporated into LCMV virions [9](v). Z inhibits EIF4E-dependent translation by reducing EIF4E affinity for cap [10, 47] (e).
5033	KRT1		NP	Protein-protein interaction - LCMV MX NP [48](e). LCMV persistent infection stabilizes the keratin network against disassembly [48](v), intact keratin network is required for cell-cell transmission during persistent infection [48](v).
4855	IKBKE		NP	Protein -protein interaction : LCMV ARM, LASV, JUNV, LATV, WWAV NP [49](e). LCMV NP colocalizes with IKBKE in infected cells [49](v). NP inhibits IKBKE kinase activity, and therefore downstream phosphorylation of IRF-3 [49](e).
104238	TFRC		GP	Viral receptor : MACV, JUNV, GTOV, SABV, but not LCMV ARM and LASV [50](ps); MACV, GTOV, JUNV but not TCRV, AMAV [51](ps); MACV but not TCRV or WWAV [52](ps); JUNV XJ13 and JUNV Cd1 [53](ps). Host orthologs of hTfR-1 act as receptors for TCRV and AMAV [56](v)
33572	DAG1		GP	Viral receptor : LCMV (Cl13, ARM, WE54), LASV, MOBV, OLVV but not GTOV [54](v, VOPBA); LATV, OLVV, Ippy but not AMAV or PARV [55](v, confirmed by VOPBA); OLVV, LATV but not PARV, PICV, AMAV, GTOV, JUNV, MACV [57] (ps); and not WWAV [52](ps); LCMV ARM53b exhibits lower affinity for alpha-dystroglycan than LCMV WE54 or LASV [55](v, VOPBA). LCMV infection interferes with expression of functional alp…
120	LARGE		GP	Protein-protein interaction - LASV GP [92](e). GP was found to associate with LARGE and DAG1 in the Golgi [92](e). Overexpression of LARGE restores expression of functional DAG1 in LCMV-infected cells [92](v).
75710	AXL		GP	Viral receptor - LASV [59](ps), LCMV (Cl13, WE, ARM) [58](ps)
76626	TYRO3		GP	Viral receptor - LASV [59](ps), LCMV (Cl13, WE, ARM) [58](ps)
1165	DCSIGN		GP	Viral receptor - LASV [59](ps), LCMV (Cl13, WE, ARM) [58](ps), expression of DCSIGN enhances JUNV IV4454 infection of NIH 3T3 cells [60](v)
12	LSECtin		GP	Viral receptor - LASV [59](ps), LCMV (Cl13, WE, ARM) [58](ps)
95785	LSIGN		_	Expression of LSIGN enhances JUNV IV4454 infection of NIH 3T3 cells [60](v)
50028	RPLP0		Z	Protein- protein interaction - LCMV ARM Z [11](e). Z co-precipitates with the nuclear but not cytoplasmic fraction of RPLP0 [11](e)
32967	RIG-I		Z, NP	Protein-protein interaction - RIG-I - Z association : MACV, JUNV, GTOV, SABV but not LASV or LCMV ARM [61](e), New World arenavirus Z may block the RIG-I/MAVS complex formation, inhibiting downstream activation of NFKB and IRF3[61](e); NP : LCMV ARM [62](e), disputed in [49](e). NP-RIG-I association is controversial as a recently published study does not find evidence of RIG-I- NP association [49…
4413	IFIH1		NP	Protein-protein interaction - LCMV ARM NP [62] (e)
146558	PRH		Z	Protein-protein interaction - LCMV-WE and and LCMV-ARM Z colocalize and interact with PRH [95, 96](v, e). Z alone does not decrease PRH levels, but PRH levels are decreased in hepatic cells and rhesus macaque livers when infected with LCMV-WE but not LCMV-ARM [95](v)
50767	RPL10a		_	Co-localization with virus-specific structures, detected with anti-NP antibody - JUNV Cd1, TCRV [108](v)
5212	EIF4G		_	Co-localization with virus-specific structures, detected with anti-NP antibody - JUNV Cd1, TCRV [108](v)
4197	EIF4A		_	Co-localization with virus-specific structures, detected with anti-NP antibody - JUNV Cd1, TCRV [108](v)
150432	G3BP1		_	Co-localization with virus-specific structures, detected with anti-NP antibody - JUNV Cd1, TCRV [108](v)
196733	RPS6		_	Co-localization with virus-specific structures, detected with anti-NP antibody - JUNV Cd1, TCRV [108](v)
77137	TSG101		Z	Required for Z budding - LCMV ARM [63](e), LASV [63, 64](e), but not TCRV [65](e), required for entry by LCMV Cl13 and LASV [67](ps). During LCMV entry, NP transiently colocalizes with Tsg101 before reaching the late endosomes [67](v)
95133, 94560, 57010, 57194, 57790, 57806, 95155, 94381, 94319, 58933, 57508	PIK3C2A,PIK3C2B, PIK3C3,PIK3CA, PIK3CB, PIK3CG, PIK3R1, PIK3R2, PIK3R3, PIK3R4, PIK3R6	PI3K	Z, GP	Required for productive infection by LCMV Cl13 [66](v), JUNV [68](v). Required for LCMV Cl13 and LASV Z budding [66](e). Required for LCMV and LASV entry [67](ps), but not LCMV ARM entry [66](ps). Role of the PI3K pathway identified through the use of the drugs wortmannin, LY294002 and BEZ235 [67-68](v). PI3K3C3 upregulated by PICV P2, but not PICV P18 infection [14](v)
52868	AKT1		_	Requirement for PI3K/Akt pathway for infection by LCMV Cl13 [66](v), and JUNV [68](v). Requirement identified through use of LY294002, which was found to prevent phosphorylation of Akt [66].
146118	Hrs		_	Required for entry - LCMV Cl13, rLCMV-LASVGP [67](v, ps). Required for entry in A549 cells but not macrophages [67](v)
64062	Vps22		_	Required for entry - LCMV Cl13, rLCMV-LASVGP [67](v, ps)
96548	Vps24		_	Required for entry - LCMV Cl13, rLCMV-LASVGP [67](v,ps)
76055	Vps4A		_	Required for Z budding for LASV [64](e), and TCRV Z VLPs [65](e), required for entry for LCMV, LCMV-LASVGP [67](v,ps)
77321	Vps4B		_	Required for Z budding for LASV [64](e), and TCRV Z VLPs [65](e), required for entry for LCMV, rLCMV-LASVGP [67](v,ps)
1001	ADAL		_	Required for virus infection - LCMV ARM [69](v) - identified through siRNA screen
818798	ARHGAP23		_	Required for virus infection - LCMV ARM [69](v) - identified through siRNA screen
50483	ATP6AP2		_	Required for virus infection - LCMV ARM [69](v) - identified through siRNA screen
139685	ATPIF1		_	Required for virus infection - LCMV ARM [69](v) - identified through siRNA screen
139999	BBC3		_	Required for virus infection - LCMV ARM [69](v) - identified through siRNA screen
1002	C14ORF111		_	Required for virus infection - LCMV ARM [69](v) - identified through siRNA screen
834	CARD14		_	Required for virus infection - LCMV ARM [69](v) - identified through siRNA screen
96814, 96866, 96346, 96218, 95938, 97112	COPA, COPB, COPB2, COPD, COPG, COPZ1	Coatomer complex	_	Required for virus infection - LCMV ARM [69](v) - identified through siRNA screen
32095	DCAF13		_	Required for virus infection - LCMV ARM [69](v) - identified through siRNA screen
32123	DCD		_	Required for virus infection - LCMV ARM [69](v) - identified through siRNA screen
14956	EIF3A		_	Required for virus infection - LCMV ARM [69](v) - identified through siRNA screen
14164	EIF3G		_	Required for virus infection - LCMV ARM [69](v) - identified through siRNA screen
14418	EIF3S2		_	Required for virus infection - LCMV ARM [69](v) - identified through siRNA screen
1003	ERN2		_	Required for virus infection - LCMV ARM [69](v) - identified through siRNA screen
184819	FAU		_	Required for virus infection - LCMV ARM [69](v) - identified through siRNA screen
150636	FBL		_	Required for virus infection - LCMV ARM [69](v) - identified through siRNA screen
151155	FOXF2		_	Required for virus infection - LCMV ARM [69](v) - identified through siRNA screen
150126	FRS2		_	Required for virus infection - LCMV ARM [69](v) - identified through siRNA screen
1005	FAM167B		_	Required for virus infection - LCMV ARM [69](v) - identified through siRNA screen
147135	GRM2		_	Required for virus infection - LCMV ARM [69](v) - identified through siRNA screen
150781	GBF1		_	Required for virus infection - LCMV ARM [69](v) - identified through siRNA screen
1006	H1FOO		_	Required for virus infection - LCMV ARM [69](v) - identified through siRNA screen
177027	HNRPK		_	Required for virus infection - LCMV ARM [69](v) - identified through siRNA screen
124737	LAMC3		_	Required for virus infection - LCMV ARM [69](v) - identified through siRNA screen
102348	MAT2A		_	Required for virus infection - LCMV ARM [69](v) - identified through siRNA screen
118779	NHP2L1		_	Required for virus infection - LCMV ARM [69](v) - identified through siRNA screen
118251	NOL5A		_	Required for virus infection - LCMV ARM [69](v) - identified through siRNA screen
118040	NRL		_	Required for virus infection - LCMV ARM [69](v) - identified through siRNA screen
57968	PIWIL3		_	Required for virus infection - LCMV ARM [69](v) - identified through siRNA screen
57396	PPP1R15B		_	Required for virus infection - LCMV ARM [69](v) - identified through siRNA screen
95039	SLC46A1		_	Required for virus infection - LCMV ARM [69](v) - identified through siRNA screen
64926	SYVN1		_	Required for virus infection - LCMV ARM [69](v) - identified through siRNA screen
1107	CDK15		_	Required for virus infection - LCMV ARM [69](v) - identified through siRNA screen
1008	DDX60L		_	Required for virus infection - LCMV ARM [69](v) - identified through siRNA screen
150315	GABBR2		_	Required for virus infection - LCMV ARM [69](v) - identified through siRNA screen
5590	IFI35		_	Required for virus infection - LCMV ARM [69](v) - identified through siRNA screen
1009	LYSMD1		_	Required for virus infection - LCMV ARM [69](v) - identified through siRNA screen
1011	OR7A10		_	Required for virus infection - LCMV ARM [69](v) - identified through siRNA screen
1100	P2RY10		_	Required for virus infection - LCMV ARM [69](v) - identified through siRNA screen
64435	SLC9A3		_	Required for virus infection - LCMV ARM [69](v) - identified through siRNA screen
1101	TAS2R48		_	Required for virus infection - LCMV ARM [69](v) - identified through siRNA screen
1102	UTP11L		_	Required for virus infection - LCMV ARM [69](v) - identified through siRNA screen
75405	UTP6		_	Required for virus infection - LCMV ARM [69](v) - identified through siRNA screen
1104	WDR46		_	Required for virus infection - LCMV ARM [69](v) - identified through siRNA screen
71651	ZNF446		_	Required for virus infection - LCMV ARM [69](v) - identified through siRNA screen
105075, 103417, 104949, 104935, 104220, 105123, 104004, 103886, 103425, 103471, 104128, 105115, 103896, 104592, 105097, 104433, 149891, 150697, 150943, 149917	TUBAI, TUBA1A, TUBA1C, TUBA3C, TUBAE, TUBA4A, TUBA4B, TUBB, TUBB1, TUBB2A, TUBB2B, TUBB2C, TUBB3, TUBB4, TUBB6, TUBB8, TUBGCP2, TUBGCP3, TUBGCP4, TUBGCP5	Tubulin	_	Required for virus infection - JUNV replication [70, 71](v); intact microtubules required for entry by rLCMV-LASVGP [77](v), microtubule dynamics are essential for JUNV infection [72](v)
51946, 51704, 52282, 52421	ACTA, ACTB, ACTC, ACTG	Actin	_	Required for virus infection - JUNV replication [70, 71](v), JUNV entry [72](v), but not for rLCMV-LASVGP or LCMV entry [75-77](v), ACTG-Differential expression levels - PICV P2, not P18 [13](v)
14620	DNM1		_	Required for JUNV entry, but not rLCMV-LASVGP or LCMV Cl13 entry [76,77](v)
15486	DNM2		_	Required for JUNV [74,77] but not rLCMV-LASVGP entry or LCMV Cl13 entry [76,77](v)
15204	EPS15		_	Required for JUNV [74,77](v) but not rLCMV-LASVGP entry [77](v) or LCMV Cl13 entry [76](v)
50568, 50058, 50216	RAB5A, RAB5B, RAB5C	Rab5	_	Required for JUNV entry [74](v), mild dependence on RAB5 for rLCMV-LASVGP entry [77](v)
49455	RAB7A	Rab7	_	Required for JUNV entry [74](v), but not for rLCMV-LASVGP entry [77](v)
101230	SKI-1		_	Required for cleavage of GP - LASV [79,80](e,v), LCMV [80](e), JUNV, MACV, GTOV [82](e), JUNV Cd1 [82](v). SKI-1 not required for cell surface expression of GP, but is required for virion infectivity [79,81](v). Arenavirus glycoproteins sequences mimic SKI-1 autoprocessing sites [83](e).
494080, 96658, 494085	CLTA, CLTB, CLTC	Clathrin	_	Clathrin-mediated endocytosis required for JUNV entry [73](v), but not LCMV [75](v) or rLCMV-LASVGP [77](v), clathrin heavy chain 2 downregulated in PICV P2 [14](v)
76676, 76319, 76518, 75562, 76558, 76269, 76885, 76113, 76925, 75800, 193245, 75756, 77045, 76231, 75860, 77369, 76447	ATP6V1A, ATP6V1B1, ATP6V1C1, ATP6V1D, ATP6V1E2, ATP6V1F, ATP6V1H, ATP6V1G1 ,ATP6V1G2, ATP6V1B2, ATP6V1E1, ATP6V1G3, ATP6V0A1, ATP6V0B, ATP6V0C, ATP6V0E1, ATP6V0D1, ATP6V0A4, ATP6V0E2, ATP6V0A2, ATP6V1C2, ATP6V0D2	V-ATPase complex	_	Required for virus infection - JUNV [78](v), ATP6V0B and ATP6V0D1 required for productive infection by LCMV ARM [69](v); change in expression levels - PICV P2, P18 [13](v)
1105	BST-2		_	Inhibits virion release - LASV [109], MACV VLPs [109], LASV VLPs [110]
4501	IRF3		NP	Is inhibited by virus - LCMV [84](v); is inhibited by NP - LCMV,LASV, WWAV, PICV, JUNV, MACV, LATV but lesser inhibitory effect of TCRV [85](e)
155979, 228738, 104931, 49197, 50727	NFKB1, NFKB2, RelA, RelB, c-Rel	NF-κB	NP	Is inhibited by NP - LCMV, LASV, WWAV, PICV, JUNV, MACV, LATV but lesser inhibitory effect of TCRV [86](e).Is inhibited by JUNV Z [61](e). RelA is upregulated in PICV infected cells [14](v). Differential NF-κB dimer formation in PICV-infected cells: formation of both p65/p50 and p50 homodimers complexes in avirulent P2 strain, but only p50 homodimers detected in virulent P18 strain infection [89]…
145644	HNRPD		_	Differential expression levels - PICV P2, P18 [13](v)
50095	HNRNPA2/B1		_	Differential expression levels - PICV P2, P18 [13](v)
145385	HNRPL		_	Differential expression levels - PICV P2, P18 [13](v)
50148	UQCRC1		_	Differential expression levels - PICV P2, P18 [13](v)
31865	DLG4		_	Upregulated - PICV P2, P18 [14](v)
139915	BCAR1		_	Upregulated - PICV P2, P18 [14](v)
15914	EDNRA		_	Upregulated - PICV P2, P18 [14](v)
1482	CAV1		_	Upregulated - PICV P2, P18 [14](v)
151260	FAS		_	Upregulated - PICV P2, P18 [14](v)
32675	DCTN1		_	Upregulated - PICV P2, P18 [14](v)
139124	DDEF1/ASAP1		_	Upregulated - PICV P2, P18 [14](v)
63215	TJP2		_	Upregulated - PICV P2, P18 [14](v)
102703	MSN		_	Upregulated - PICV P2, P18 [14](v)
140332	BTK		_	Upregulated - PICV P2, P18 [14](v)
102124	LYN		_	Upregulated - PICV P2, P18 [14](v)
57932	PTEN		_	Upregulated - PICV P2, P18 [14](v)
102256	MAPK8		_	Upregulated - PICV P2, P18 [14](v)
32233	CK2		_	Upregulated - PICV P2, P18 [14](v)
63491	SUPT5H		_	Upregulated - PICV P2, P18 [14](v)
63900	STRN3		_	Upregulated - PICV P2, P18 [14](v)
140742	STK6		_	Upregulated - PICV P2, P18 [14](v)
64552	STAT1		_	Upregulated - PICV P2, P18 [14](v)
63675	STAT3		_	Upregulated - PICV P2, P18 [14](v)
51622	MLLT4		_	Upregulated - PICV P2, P18 [14](v)
424	CBL		_	Upregulated - PICV P2, P18 [14](v)
15526	TCEB3		_	Upregulated - PICV P2, P18 [14](v)
118104	NR4A2		_	Upregulated - PICV P2, P18 [14](v)
149331	FEN1		_	Upregulated - PICV P2, P18 [14](v)
104614	TGFI1		_	Upregulated - PICV P2, P18 [14](v)
150496	FEZ1		_	Upregulated - PICV P2, P18 [14](v)
87394	SHIP		_	Upregulated- PICV P2, not P18 [14](v)
539920	HSP90		_	Upregulated- PICV P2, not P18 [14](v)
64610	SPTC1		_	Upregulated - PICV P2, P18 [14](v)
118791	NLN		_	Upregulated- PICV P, not P18 [14](v)
63663	STAT5A		_	Upregulated - PICV P2, P18 [14](v); differential phosphorylation PICV P2 [15](v)
64239	SRPK2		_	Upregulated - PICV P2, P18 [14](v)
57162	PLEK2		_	Upregulated - PICV P2, P18 [14](v)
57812	PLCB1		_	Upregulated- PICV P2, not P18 [14](v)
76528	UBC9		_	Upregulated - PICV P2, P18 [14](v)
72401	XPA		_	Upregulated- PICV P2, not P18 [14](v)
98	CD9		_	Upregulated- PICV P2, not P18 [14](v)
52956	4EBP1		_	Upregulated- PICV P2, not P18 [14](v)
5718	KAP3		_	Upregulated- PICV P2, not P18 [14](v)
1007	IGTP		_	Upregulated - PICV P2, P18 [14](v)
228251	STK3		_	Upregulated- PICV P2, not P18 [14](v)
15732	E2F1		_	Upregulated- PICV P2, not P18 [14](v)
64026	SOD2		_	Downregulated - PICV P2, not P18 [14](v)
51389	AMPKb		_	Downregulated - PICV P2, not P18 [14](v)
124949	LCP2		_	Downregulated - PICV P2, not P18 [14](v)
118094	MXI1		_	Downregulated - PICV P2, not P18 [14](v)
58444	PRP17		_	Downregulated - PICV P2, P18 [14](v)
145918	HRK		_	Downregulated - PICV P2, not P18 [14](v)
101740	MEF2D		_	Downregulated - PICV P2, not P18 [14](v)
33376	CTDSL		_	Downregulated - PICV P2, not P18 [14](v)
49414	RAB11		_	Downregulated - PICV P2, not P18 [14](v)
124515	KATNB1		_	Downregulated - PICV P2, not P18 [14](v)
33592	CYBB		_	Downregulated - PICV P2, not P18 [14](v)
95829	HSP60		_	Differential expression levels [13, 14](v)
4171	PRKAR1B		_	Downregulated - PICV P2, P18 [14](v)
14668	E2AK2		_	Downregulated - PICV P2, not P18 [14](v)
118377	NEK3		_	Downregulated - PICV P2, not P18 [14](v)
103523	TIAR		_	Downregulated - PICV P2, P18 [14](v)
4409	i-CAM1		_	Upregulated - JUNV P3441, JUNV XJ44 [87](v)
75744	v-CAM1		_	Upregulated - JUNV P3441, JUNV XJ44 [87](v)
32199	DAF		_	Upregulated - JUNV P3441, JUNV XJ44 [87](v), greater increase for JUNV P3441 than JUNV XJ44 [87](v)
104206	TNFA		_	Upregulated in AHF patients [94](v) and LCMV-ARM [107](v), produced in response to TCRV but JUNV (Romero strain) in monocytes and macrophages [103](v), TNFA not upregulated in Lassa fever patients [105](v). adPICV but not PICV 3739 resulted in upregulation of TNF-alpha levels [93](v).
76425	VWF		_	Downregulated - JUNV P3441, JUNV XJ44 [87](v), upregulated in AHF patients [88](v)
15878	DTNA		_	Downregulated - PICV P2, P18 [14](v)
15576	DTNB		_	Downregulated - PICV P2, P18 [14](v)
52629	ANXA4		_	Downregulated - PICV P2, P18 [14](v)
150801	FHIT		_	Downregulated - PICV P2, P18 [14](v)
544314	GNB2L1		_	Downregulated - PICV P2, P18 [14](v)
5882	NFKBIE		_	Downregulated - PICV P2, P18 [14](v)
102266	MSH6		_	Downregulated - PICV P2, P18 [14](v)
72143	XRCC4		_	Downregulated - PICV P2, P18 [14](v)
101998	CDC25B		_	Downregulated - PICV P2, P18 [14](v)
96780	CHEK2		_	Downregulated - PICV P2, P18 [14](v)
32761	DNAJB1		_	Downregulated - PICV P2, P18 [14](v)
72469	XPO1		_	Downregulated - PICV P2, P18 [14](v)
64095	SMARCD1		_	Downregulated - PICV P2, P18 [14](v)
93464	TP53		_	Downregulated - PICV P2, P18 [14](v)
65233	STMN1		_	Downregulated - PICV P2, P18 [12](v). Downregulation of stathmin was more pronounced in P2 -infected cells than P18 [12](v). Differential phosphorylation PICV P2, P18 [15](v)
49891	RPLP1		_	Downregulation of protein levels - LCMV [11](v).
50615	RPLP2		_	Downregulation of protein levels - LCMV [11](v).
57330	PTMA		_	Altered secretion - PICV [12](v)
124392	LGALS3		_	Upregulation of protein levels - JUNV [96](v); differential phosphorylation - PICV P2, P18 [15](v)
102867	MAPK10		_	Downregulated - PICV P2, not 18 [14](v)
64163	SRP54		_	Downregulated - PICV P2, not 18 [14](v)
50032	RANBP3		_	Downregulated - PICV P2, not 18 [14](v)
430274	NUTF2		_	Downregulated - PICV P2, not 18 [14](v)
101478	MTX-1		_	Downregulated PICV P2, upregulated PICV P18 [14](v)
146560	HMOX1		_	Downregulated - PICV P2, not 18 [14](v)
1108	ZFP37		_	Downregulated - PICV P2, P18 [14](v)
73107	XRCC6		_	Downregulated - PICV P2, P18 [14](v)
14620	DNM1		_	Downregulated - PICV P2, P18 [14](v)
33108	CTBP1		_	Downregulated - PICV P2, not 18 [14](v)
534616	FAK		_	Downregulated - PICV P2, P18 [14](v)
50218	RAC1		_	Downregulated - PICV P2, not 18 [14](v)
64503	STX11		_	Downregulated - PICV P2, P18 [14](v)
145948	GRP78		_	Downregulated - PICV P2, not 18 [14](v)
14216	EPM2A		_	Downregulated - PICV P2, P18 [14](v)
63563	SNCA		_	Downregulated - PICV P2, P18 [14](v)
50903	RAB8A		_	Downregulated - PICV P2, P18 [14](v)
4981	ITCH		_	Downregulated - PICV P2, not 18 [14](v)
1010	CALB2		_	Downregulated - PICV P2, not 18 [14](v)
1790	CASP6		_	Downregulated - PICV P2, not 18 [14](v)
1742	CDC37		_	Upregulated - PICV P18, not P2 [14](v)
547739	SNAPIN		_	Upregulated - PICV P18, not P2 [14](v)
138889	GOLIM3		_	Upregulated - PICV P18, not P2 [14](v)
145824	GSK3B		_	Upregulated - PICV P18, not P2 [14](v)
57068	PKN2		_	Upregulated - PICV P18, not P2 [14](v)
57142	PPME1		_	Upregulated - PICV P18, not P2 [14](v)
13968	POLD1		_	Upregulated - PICV P18, not P2 [14](v)
124077	PRKCA		_	Upregulated - PICV P18, not P2 [14](v)
117660	NLRP2		_	Upregulated - PICV P18, not P2 [14](v)
71531	ZNF148		_	Upregulated - PICV P18, not P2 [14](v)
118334	NCK1		_	Upregulated - PICV P18, not P2 [14](v)
50791	RBBP9		_	Downregulated - PICV P18, not P2 [14](v)
102407	ERK1		_	Downregulated - PICV P18, not P2 [14](v)
139530	ARRB1		_	Downregulated - PICV P18, not P2 [14](v)
51630	AIMP1		_	Downregulated - PICV P18, not P2 [14](v)
14050	ERCC2		_	Downregulated - PICV P18, not P2 [14](v)
145607	HSF4		_	Downregulated - PICV P18, not P2 [14](v)
49935	PTPRT		_	Downregulated - PICV P18, not P2 [14](v)
95900	COX7A2L		_	Downregulated - PICV P2, not P18[14](v)
5818,	CAMK2A		_	Upregulated - PICV P2, not P18 [14](v); differential phosphorylation - PICV P2, P18 [15](v)
145401	GRIA2		_	Differential phosphorylation - PICV P2, P18 [15](v)
288	CFTR		_	Differential phosphorylation - PICV P2, P18 [15](v)
58	CD3Z		_	Differential phosphorylation - PICV P2, P18 [15](v)
102226	MARCKS		_	Differential phosphorylation - PICV P2, P18 [15](v)
14516	EGFR		_	Differential phosphorylation - PICV P2, P18 [15](v)
139422	BLK		_	Differential phosphorylation - PICV P2, P18 [15](v)
117998	NCF1		_	Differential phosphorylation - PICV P2, P18 [15](v)
146903	GYS1		_	Differential phosphorylation - PICV P2, P18 [15](v)
161395	NPM1		_	Differential phosphorylation - PICV P2, P18 [15](v)
101374	MGP		_	Differential phosphorylation - PICV P2, P18 [15](v)
87720	SCN2A1		_	Differential phosphorylation - PICV P2, P18 [15](v)
33498	CSF1R		_	Differential phosphorylation - PICV P2, P18 [15](v)
123691	KIT		_	Differential phosphorylation - PICV P2, P18 [15](v)
4293	IL1R1		_	Differential phosphorylation - PICV P2, P18 [15](v)
279819	RET		_	Differential phosphorylation - PICV P2, P18 [15](v)
5254	INSR		_	Differential phosphorylation - PICV P2, P18 [15](v)
58546	PDGFRB		_	Differential phosphorylation - PICV P2, P18 [15](v)
76470	VIM		_	Differential phosphorylation - PICV P2, P18 [15](v)
51618	ACACA		_	Differential phosphorylation - PICV P2, P18 [15](v)
124565	PKLR		_	Differential phosphorylation - PICV P2, P18 [15](v)
104443	MAPT		_	Differential phosphorylation - PICV P2, P18 [15](v)
93700	PCYT1A		_	Differential phosphorylation - PICV P2, P18 [15](v)
49765	RAB4A		_	Differential phosphorylation - PICV P2, P18 [15](v)
65333	SRF		_	Differential phosphorylation - PICV P2, P18 [15](v)
123583	LMNA		_	Differential phosphorylation - PICV P2, P18 [15](v)
123278	LMNB1		_	Differential phosphorylation - PICV P2, P18 [15](v)
150795	FGA		_	Differential phosphorylation - PICV P2, not P18 [15](v)
139731	ATP1A1		_	Differential phosphorylation - PICV P2, not P18 [15](v)
93992	PLA2G4A		_	Differential phosphorylation - PICV P2, not P18 [15](v)
102504	MBP		_	Differential phosphorylation - PICV P2, not P18 [15](v)
97098	COL1A2		_	Differential phosphorylation - PICV P2, not P18 [15](v)
64085	SYN1		_	Differential phosphorylation - PICV P2, not P18 [15](v)
51526	ANXA1		_	Differential phosphorylation - PICV P2, not P18 [15](v)
52180	ANXA2		_	Differential phosphorylation - PICV P2, not P18 [15](v)
145991	GRIK2		_	Differential phosphorylation - PICV P2, not P18 [15](v)
146086	GLRA1		_	Differential phosphorylation - PICV P2, not P18 [15](v)
117478	MPZ		_	Differential phosphorylation - PICV P2, not P18 [15](v)
64872	STOM		_	Differential phosphorylation - PICV P2, not P18 [15](v)
139643	ATP2B1		_	Differential phosphorylation - PICV P2, not P18 [15](v)
52787	HLAB		_	Differential phosphorylation - PICV P2, not P18 [14](v); upregulation in LASV-infected monkeys [106](v)
15798	ERBB2		_	Differential phosphorylation - PICV P2, not P18 [15](v)
14460	VIL2		_	Differential phosphorylation - PICV P2, not P18 [15](v)
101498	MET		_	Differential phosphorylation - PICV P2, not P18 [15](v)
52743	ADRB2		_	Differential phosphorylation - PICV P2, not P18 [15](v)
57936	PLCG1		_	Differential phosphorylation - PICV P2, not P18 [15](v)
123557	PRKCD		_	Differential phosphorylation - PICV P2, not P18 [15](v)
49536	RASA1		_	Differential phosphorylation - PICV P2, not P18 [15](v)
94576	PXN		_	Differential phosphorylation - PICV P2, not P18 [15](v)
1057	CALD1		_	Differential phosphorylation - PICV P2, not P18 [15](v)
146689	HMGCR		_	Differential phosphorylation - PICV P2, not P18 [15](v)
87366	S100A9		_	Differential phosphorylation - PICV P2, not P18 [15](v)
52394	YWHAQ		_	Differential phosphorylation - PICV P2, not P18 [15](v)
145852	HS90B		_	Differential phosphorylation - PICV P2, not P18 [15](v)
145999	HS90A		_	Differential phosphorylation - PICV P2, not P18 [15](v)
76805	TH		_	Differential phosphorylation - PICV P2, not P18 [15](v)
117313	NFM		_	Differential phosphorylation - PICV P2, not P18 [15](v)
94223	PDHA1		_	Differential phosphorylation - PICV P2, not P18 [15](v)
14434	EEF2		_	Differential phosphorylation - PICV P2, not P18 [15](v)
1369	CDK2		_	Differential phosphorylation - PICV P2, not P18 [15](v)
49714	RB1		_	Differential phosphorylation - PICV P2, not P18 [15](v)
4091	JUN		_	Differential phosphorylation - PICV P2, not P18 [15](v)
145616	HCLS1		_	Differential phosphorylation - PICV P2, not P18 [15](v)
51658	AGT		_	Differential phosphorylation - PICV P18, not P2 [15](v)
4871	ITPR1		_	Differential phosphorylation - PICV P18, not P2 [15](v)
1013	PKIR		_	Differential phosphorylation - PICV P18, not P2 [15](v)
76177	VTN		_	Differential phosphorylation - PICV P18, not P2 [15](v)
14726	ENO1		_	Differential phosphorylation - PICV P18, not P2 [15](v), differential expression levels PICV P2, not P18 [13](v)
58346	PDC		_	Differential phosphorylation - PICV P18, not P2 [15](v)
52535	ACO1		_	Differential phosphorylation - PICV P18, not P2 [15](v)
140260	ATF2		_	Differential phosphorylation - PICV P18, not P2 [15](v)
51119	GOT2		_	Differential expression levels - PICV P2, not P18 [13](v)
104358	VCP		_	Differential expression levels - PICV P2, not P18 [13](v)
146848	HSPA6		_	Differential expression levels - PICV P2, not P18 [13](v)
146490	HSPA8		_	Differential expression levels - PICV P2, not P18 [13](v)
117054	NONO		_	Differential expression levels - PICV P2, not P18 [13](v)
104012	TARDBP		_	Differential expression levels - PICV P2, not P18 [13](v)
147227	HBD		_	Differential expression levels - PICV P2, not P18 [13](v)
76101	UQCRFS1		_	Differential expression levels - PICV P2, not P18 [13](v)
101912	MAPRE1		_	Differential expression levels - PICV P18, not P2 [13](v)
4963	IDH3A		_	Differential expression levels - PICV P18, not P2 [13](v)
57246	PHB		_	Differential expression levels - PICV P18, not P2 [13](v)
50022	RBM3		_	Differential expression levels - PICV P18, not P2 [13](v)
140300, 140556	ATP5A1, ATP5B	Mitochondrial F1-F0 ATP synthase	_	Differential expression levels - ATP5A1: PICV P2, P18 [13](v); ATP5B: PICV P18, not P2 [13](v)
118711	NOS3		_	Upregulated- JUNV P3441, not JUNV XJ44 [87](v)
5890	IL6		_	Upregulated - JUNVv (AHF patients) [94](v); upregulated - TCRV, not JUNV in macrophages/ monocytes [103](v); upregulated in LASV-infected monkeys in terminal stages [106](v)
5464	IL8		_	Upregulated - JUNVv (AHF patients) [94](v) and LASV (HF patients) [105](v), but not in LASV-infected monkeys [106](v)
4227	IL10		_	Upregulated - JUNVv (AHF patients) [94](v); Upregulated - TCRV, not JUNV in macrophages/ monocytes [103](v)
5136	IFNB		_	Produced in macrophages and monocytes upon infection with JUNV Cd1 [98, 99](v), but not Romero strain [98, 103](v) or TCRV [103](v). Both viruses are insensitive to IFN [98](v).
52262	A1AT		_	Upregulated - JUNVv (AHF patients) [94](v)
103954	TLR2		_	Activated by both JUNV Parodi and Cd1 strains GP [99](v), activated and upregulated by LCMV ARM [107](v)
4905	IFNA		_	No effect on IFN-alpha during infection of macrophages by TCRV or JUNV (Romero strain) [103](v). Circulating IFN-alpha detected in guinea pigs upon infection with JUNV XJ13 strain [100](v), and lower levels for MC2 strain [101](v). High levels of IFN-alpha found in AHF patients [102](v). Upregulation of IFN-alpha levels in LASV-infected monkeys [106](v)
14646	EPO		_	Differential expression levels of erythropoietin in AHF patients [104](v)
103924	THPO		_	Increase in thrombopoietin in AHF patients [104](v)
33458	G-CSF		_	Correlation between G-CSF and TNF-alpha levels in AHF patients [104](v)
